# Supplementary material for: PASTA: splice junction identification from RNA-Sequencing data
Source: PubMed Central journal article supplement (PMC3623791; doi:10.1186/1471-2105-14-116), 2013-04-04
Supplement: 1471-2105-14-116-S1.pdf [file 1471-2105-14-116-S1.pdf]

# PASTA: Splice Junction Identification from RNA-Sequencing Data

## --Supplementary Materials

A. Intron distribution approximation

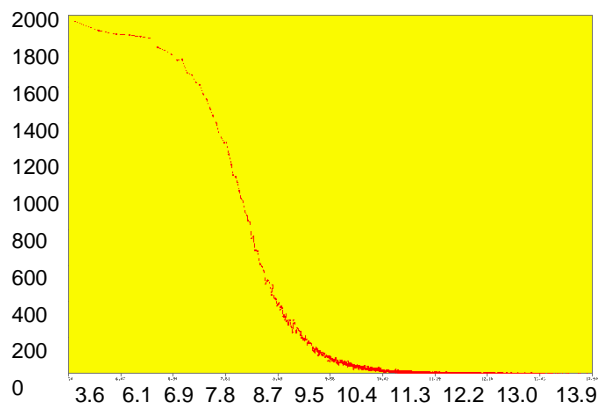

B. Pareto-value distribution

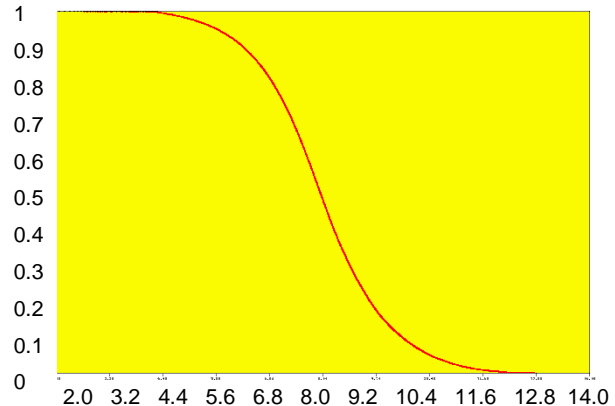

**Figure 1. Intron distribution simulated by Pareto distribution function.** A) Distribution of number of occurrences for each mouse intron sizes using Ensembl gene annotations. It shows the number of occurrences for log-normalized intron sizes within each range of 100 base pairs. B). Pareto-value distribution given the logarithm normalized mouse intron sizes.

The procedure to generate the Pareto approximation is as follows. We collected all introns appearing in current ENSEMBL mouse gene annotations and we sorted them by size in ascending order. We subdivided the entire range of intron lengths in bins of 100bp, and we counted the number of introns falling into each bin. The recorded occurrences for each region will be further transformed by logarithm so the intron occurrences will decrease steadily as their size in logarithm increases. Finally, we calculated the score of each intron as  $r_i = 1 - x_i / t$ , where  $x_i$  represents the logarithm of the number of intron occurrences in the  $i$ th bin and  $t$  is the total number of introns under study.

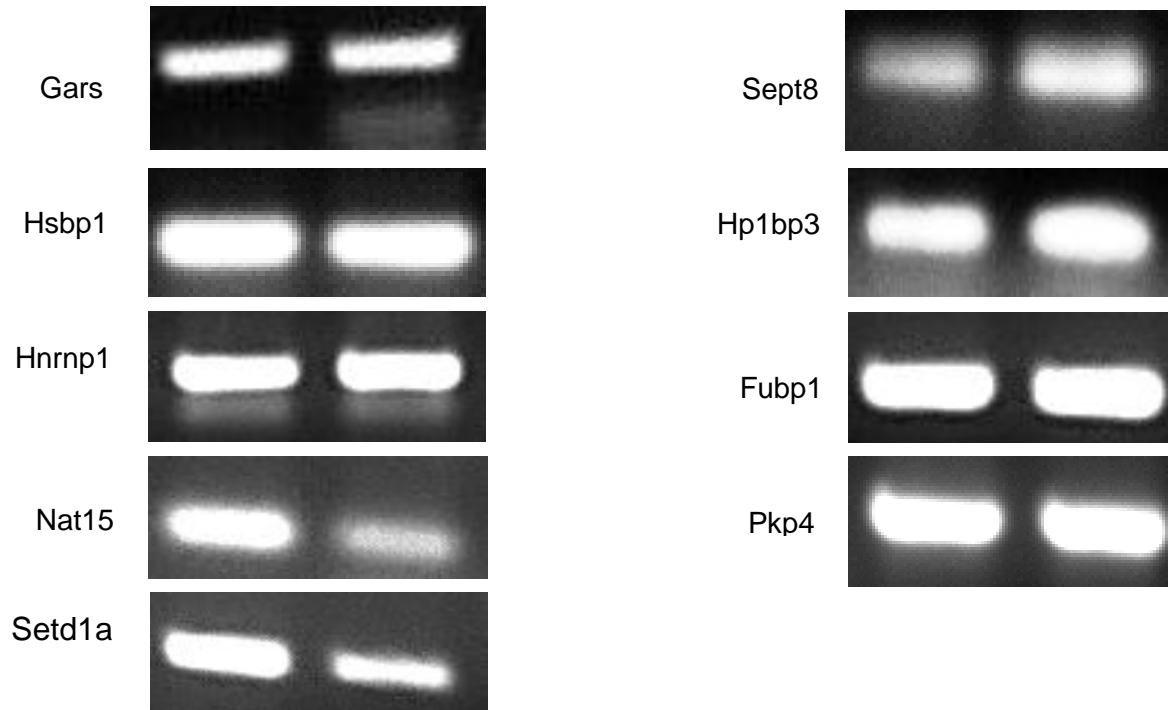

**Figure 2. PCR results from nine splice junction target candidates with AT-AC or GC-AG minor splice sites.** Gene name is labeled to the left of each PCR result. Results for the five genes to the left are targets with AT-AC signals and the remaining four genes to the right are targets with GC-AG signals. Control sample is shown to the left of knockout for each gene.

**Table 1. Logistic regression coefficients form model organism mouse and maize.** This table shows the logistic regression coefficient estimates and their corresponding z value and p-value for model organism mouse and maize.

|       |                 | Estimate   | Std. Error | Z value  | Pr(> z ) |
|-------|-----------------|------------|------------|----------|----------|
| Mouse | Intercept       | -118.94513 | 0.55965    | -212.534 | <2e-16   |
|       | Alignment score | 117.16771  | 0.56326    | 208.017  | <2e-16   |
|       | BPS signal      | 0.95668    | 0.49668    | 1.926    | 0.0541   |
|       | Intron size     | 3.74018    | 0.03439    | 108.767  | <2e-16   |
|       | Splice signal   | 3.69588    | 0.02807    | 131.671  | <2e-16   |
| Maize | Intercept       | -85.31255  | 0.51233    | -166.518 | < 2e-16  |
|       | Alignment score | 78.56554   | 0.51702    | 151.958  | < 2e-16  |
|       | BPS signal      | 0.34553    | 0.04721    | 7.319    | 2.50e-13 |
|       | Intron size     | 7.65690    | 0.08022    | 95.453   | < 2e-16  |
|       | Splice signal   | 2.76183    | 0.02494    | 110.724  | < 2e-16  |

**Table 2. Number of reads and junctions detected.** This table displays the total number of reads, the total number of junctions identified by PASTA and RUM, and the ratio between these two numbers for Run 1 and Run 2 respectively.

| Run |         |        | Number of reads (millions) | PASTA Junctions | RUM junctions | Ratio |
|-----|---------|--------|----------------------------|-----------------|---------------|-------|
| 1   | Control | Lane 1 | 19.2                       | 165541          | 144710        | 1.144 |
|     |         | Lane 3 | 15.4                       | 149797          | 136760        | 1.095 |
|     | Mutant  | Lane 1 | 21.8                       | 169493          | 145972        | 1.161 |
|     |         | Lane 2 | 17.9                       | 157481          | 137855        | 1.142 |
|     |         | Lane 3 | 22.3                       | 162408          | 139529        | 1.164 |
|     |         | Lane 4 | 39.2                       | 202157          | 158794        | 1.273 |
| 2   | Control | Lane 1 | 29.9                       | 166050          | 161436        | 1.029 |
|     |         | Lane 2 | 8.74                       | 141885          | 138421        | 1.025 |
|     |         | Lane 3 | 10.2                       | 144879          | 139157        | 1.041 |
|     | Mutant  | Lane 1 | 27.6                       | 148238          | 143105        | 1.036 |
|     |         | Lane 2 | 10.6                       | 160885          | 149479        | 1.076 |
|     |         | Lane 3 | 25.4                       | 175240          | 155741        | 1.125 |
|     |         | Lane 4 | 25.6                       | 177388          | 155540        | 1.140 |

**Table 3. Number of junctions from ENSEMBL known genes.** This table displays the number of junctions in ENSEMBL known gene models identified by PASTA and RUM for Run 1 and Run 2 respectively.

| Run |         |        | PASTA  | RUM    | Common | Common / PASTA | Common / RUM |
|-----|---------|--------|--------|--------|--------|----------------|--------------|
| 1   | Control | Lane 1 | 128811 | 133445 | 125038 | 0.971          | 0.937        |
|     |         | Lane 3 | 120465 | 127447 | 117354 | 0.974          | 0.921        |
|     | Mutant  | Lane 1 | 129099 | 134213 | 125341 | 0.971          | 0.934        |
|     |         | Lane 2 | 122237 | 128372 | 118687 | 0.971          | 0.925        |
|     |         | Lane 3 | 123860 | 129124 | 120100 | 0.970          | 0.930        |
|     |         | Lane 4 | 142097 | 142803 | 136518 | 0.961          | 0.956        |
| 2   | Control | Lane 1 | 130900 | 139695 | 129565 | 0.990          | 0.927        |
|     |         | Lane 2 | 119398 | 127167 | 117676 | 0.986          | 0.925        |
|     |         | Lane 3 | 119951 | 127369 | 118132 | 0.985          | 0.927        |
|     | Mutant  | Lane 1 | 122890 | 130213 | 121062 | 0.985          | 0.930        |
|     |         | Lane 2 | 127855 | 134217 | 125717 | 0.983          | 0.937        |
|     |         | Lane 3 | 132545 | 137213 | 129943 | 0.980          | 0.947        |
|     |         | Lane 4 | 134050 | 137149 | 131281 | 0.979          | 0.957        |

**Table 4. List of primers for PCR validations.** A total of nine PASTA predicted splice junctions with minor splice sites GC-AG or AT-AC are selected.

| Gene   | Forward              | Reverse               | Tm   |
|--------|----------------------|-----------------------|------|
| Hp1bp3 | AAGAATCCGGTGGCTCTGAC | TTGGGACTTGGCTGGTGTTT  | 60°C |
| Fubp1  | GTCGAGGACGAGGTAGAGGT | GTGGAGTGCCCCGAATTGTA  | 60°C |
| Sept8  | CTGACCATCGTGGATGCTGT | CAAACCTGCGCGTCGATGTAG | 60°C |
| Pkp4   | TCCTGTCCGATGAAACCGTG | GGTGGACAGAGAAGGGTGTG  | 60°C |
| Gars   | TGTTGGATGTGCTGACCGTT | TGTAGCACTCATCACAGGCG  | 60°C |
| Nat15  | CGAGGGGTCCTCAAAGATGG | CCCAGGTGCTGGATGTAGTC  | 60°C |
| Hnrnp1 | GAGCGTAAACAGCGTGCTTC | GGGTCACCTTGTCCACTGAG  | 60°C |
| Setd1a | CCTCCTTCTTTGAGCCGAG  | TCTTTTGCGCTTTGGAGTGC  | 60°C |
| Hsbp1  | AGACCATGCAGGACATCACC | GTCGTCAATCCGACTGCTCA  | 60°C |
